# Supplementary material for: Nanoplasmonic sensor array for the detection and discrimination of pesticide residues in citrus fruits
Source: Royal Society of Chemistry journal article supplement (doi:10.1039/d0ay02039g), 2020-01-01
Supplement: d0ay02039g1.pdf [file d0ay02039g1.pdf]

## Supporting Information

### Nanoplasmonic Sensor Array for Detection and Discrimination of Pesticide Residues in Citrus

M. Reza Mirghafouri<sup>a</sup>, Samira Abbasi-Moayed<sup>a</sup>, Forough Ghasemi<sup>b,\*</sup>, M. Reza Hormozi-Nezhad<sup>a,\*</sup>

<sup>a</sup>Department of Chemistry, Sharif University of Technology, Tehran, 11155-9516, Iran

<sup>b</sup>Department of Nanotechnology, Agricultural Biotechnology Research Institute of Iran (ABRII), Agricultural Research, Education, and Extension Organization (AREEO), Karaj, 3135933151, Iran

\*Corresponding authors:

Forough Ghasemi, email: [forough.ghasemi@abrii.ac.ir](mailto:forough.ghasemi@abrii.ac.ir)  
ORCID iD: 0000-0003-1093-2058

M. Reza Hormozi-Nezhad, email: [hormozi@sharif.edu](mailto:hormozi@sharif.edu)  
ORCID iD: 0000-0002-7472-1850

## Table of contents

| Content                                                                                                                                                                                                                                                                                                                                                                                                                                | Page       |
|----------------------------------------------------------------------------------------------------------------------------------------------------------------------------------------------------------------------------------------------------------------------------------------------------------------------------------------------------------------------------------------------------------------------------------------|------------|
| <b>Fig. S1.</b> Chemical structure of (a) bifenazate (BF), (b) azinphos-methyl (AM), (c) paraquat (PQ), (d) thiometon (TM), and (e) parathion-methyl (PM) pesticides.                                                                                                                                                                                                                                                                  | <b>4S</b>  |
| <b>Fig. S2.</b> UV–Vis spectrum, intensity size distribution, and TEM image of citrate-capped (CT) AuNPs (a, b, c, respectively), and borohydride-capped (BH) AuNPs (d, e, f, respectively)                                                                                                                                                                                                                                            | <b>5S</b>  |
| <b>Fig. S3.</b> The stability of (a) CT-AuNPs ( $0.5 \text{ nmol L}^{-1}$ in the presence of citrate buffer pH 4.5), and (b) BH-AuNPs ( $0.224 \text{ } \mu\text{mol L}^{-1}$ in the presence of phosphate buffer pH 8.0) over time                                                                                                                                                                                                    | <b>6S</b>  |
| <b>Fig. S4.</b> Time-course variation in UV-Vis spectra of the sensing element (a) CT AuNPs, and (b) BH AuNPs upon the addition of TM at a concentration of $100 \text{ ng mL}^{-1}$ . The effect of incubation time (as bar plot) on the aggregation of the sensing element (c) CT-AuNPs, and (d) BH-AuNPs. The signal ( $A_{700}/A_{520}$ ) is defined as the ratio of absorbance values at wavelength 700 and 520 nm, respectively. | <b>7S</b>  |
| <b>Fig. S5.</b> Absorbance spectra of the sensing element (a) CT-AuNPs and (b) BH-AuNPs before and after exposure to different concentrations of bifenazate (BF) ranging from $20\text{-}5000 \text{ ng mL}^{-1}$                                                                                                                                                                                                                      | <b>8S</b>  |
| <b>Fig. S6.</b> Absorbance spectra of the sensing element (a) CT-AuNPs and (b) BH-AuNPs before and after exposure to different concentrations of paraquat (PQ) ranging from $20\text{-}5000 \text{ ng mL}^{-1}$                                                                                                                                                                                                                        | <b>9S</b>  |
| <b>Fig. S7.</b> Absorbance spectra of the sensing element (a) CT-AuNPs and (b) BH-AuNPs before and after exposure to different concentrations of azinphos-methyl (AM) ranging from $20\text{-}5000 \text{ ng mL}^{-1}$                                                                                                                                                                                                                 | <b>10S</b> |
| <b>Fig. S8.</b> Absorbance spectra of the sensing element (a) CT-AuNPs and (b) BH-AuNPs before and after exposure to different concentrations of thiometon (TM) ranging from $20\text{-}5000 \text{ ng mL}^{-1}$                                                                                                                                                                                                                       | <b>11S</b> |
| <b>Fig. S9.</b> Absorbance spectra of the sensing element (a) CT-AuNPs and (b) BH-AuNPs before and after exposure to different concentrations of parathion-methyl (PM) ranging from $20\text{-}5000 \text{ ng mL}^{-1}$                                                                                                                                                                                                                | <b>12S</b> |
| <b>Fig. S10.</b> Intensity size distribution of the sensing element CT-AuNPs (a) before, and after exposure to $200 \text{ ng mL}^{-1}$ of (b) BF, (c) PQ, (d) AM, (e) TM, and (f) PM                                                                                                                                                                                                                                                  | <b>13S</b> |
| <b>Fig. S11.</b> Intensity size distribution of the sensing element BH-AuNPs (a) before, and after exposure to $200 \text{ ng mL}^{-1}$ of (b) BF, (c) PQ, (d) AM, (e) TM, and (f)                                                                                                                                                                                                                                                     | <b>14S</b> |
| <b>Fig. S12.</b> Absorbance response patterns (bar plots) of the sensing elements (CT- and BH-AuNPs) against BF, PQ, AM, TM, and PM pesticides at different concentrations ranging from $20\text{-}5000 \text{ ng mL}^{-1}$ at six wavelengths of 768, 702, 634, 591, 562, and 466 nm                                                                                                                                                  | <b>15S</b> |

**Fig. S13.** Heat map of the sensing elements (CT- and BH-AuNPs) against BF, PQ, AM, TM, and PM pesticides at different concentrations ranging from 20-5000 ng mL<sup>-1</sup> at six wavelengths of 768, 702, 634, 591, 562, and 466 nm **16S**

**Table S1.** Leave-one-out analysis by Jackknifing in the linear discriminant analysis (LDA); each group contains eight concentrations of the pesticides (BF, PQ, AM, TM, and PM) with three replicates. **17S**

**Fig. S14.** Predicted vs. nominal plots from PLS- regression method for (a) BF, (b) PQ, (c) AM, (d) TM, and (e) PM pesticides **18S**

**Fig. S15.** Absorbance spectra of the sensing element (a) CT-AuNPs and (b) BH-AuNPs before and after exposure to a total concentration of 100 ng mL<sup>-1</sup> of PQ, AM, and their mixtures **19S**

**Fig. S16.** (a) Two-dimensional score plot discriminating the mixtures of PQ and AM with different percentage (total concentration was 100 ng mL<sup>-1</sup>), and (b) canonical variable 1 (from part a) plotted versus the percentage of PQ **20S**

**Table S2.** Leave-one-out analysis by Jackknifing in the linear discriminant analysis (LDA); each group contains a mixture of PQ and AM in different percentage with three replicates. **21S**

**Fig. S17.** Absorbance response patterns (bar plots) of the sensing elements (CT- and BH-AuNPs) against the mixtures of PQ and AM with different percentage (total concentration was 100 ng mL<sup>-1</sup>) at six wavelengths of 768, 702, 634, 591, 562, and 466 nm **22S**

**Fig. S18.** Heat map of the sensing elements (CT- and BH-AuNPs) against the mixtures of PQ and AM with different percentage (total concentration was 100 ng mL<sup>-1</sup>) at six wavelengths of 768, 702, 634, 591, 562, and 466 nm **23S**

**Table S3.** Identification of unknown pesticides in the lime samples based on the calculation of Mahalanobis distance of each unknown from the centroid of training groups. LDA was performed on the data matrix containing the test set data (BF, PQ, AM, TM, and PM at concentrations 200 ng mL<sup>-1</sup> with three replicates in the real sample of lime) and the training set data (BF, PQ, AM, TM, and PM at concentrations 60, 80, 100, 200, 400, 600, 800, and 1000 ng mL<sup>-1</sup> with three replicates). **24S**

**Table S4.** A list of NP-based sensor arrays for the identification of pesticides (OP= organophosphate, CB= carbamate, BP= bipyridylum) **25S**

**References** **26S**

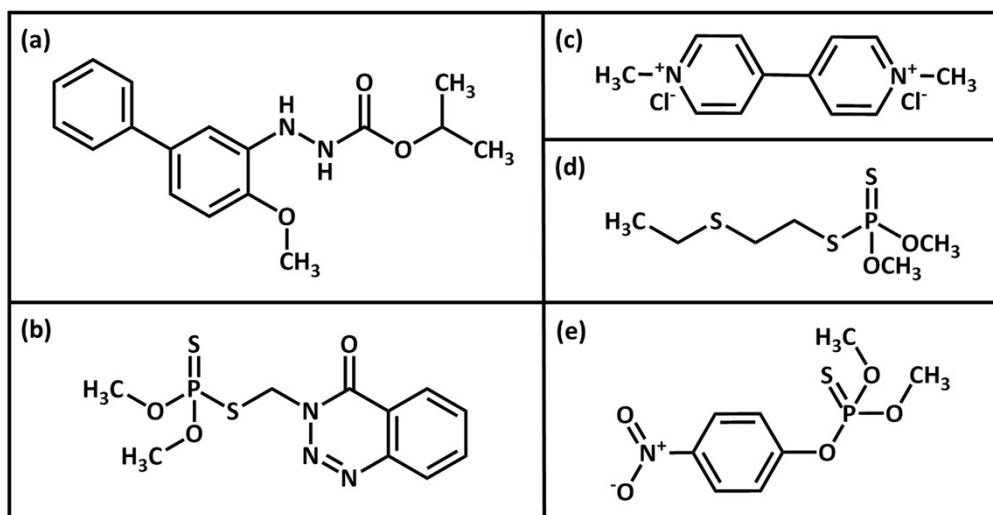

**Fig. S1.** Chemical structure of (a) bifentazate (BF), (b) azinphos-methyl (AM), (c) paraquat (PQ), (d) thiometon (TM), and (e) parathion-methyl (PM) pesticides.

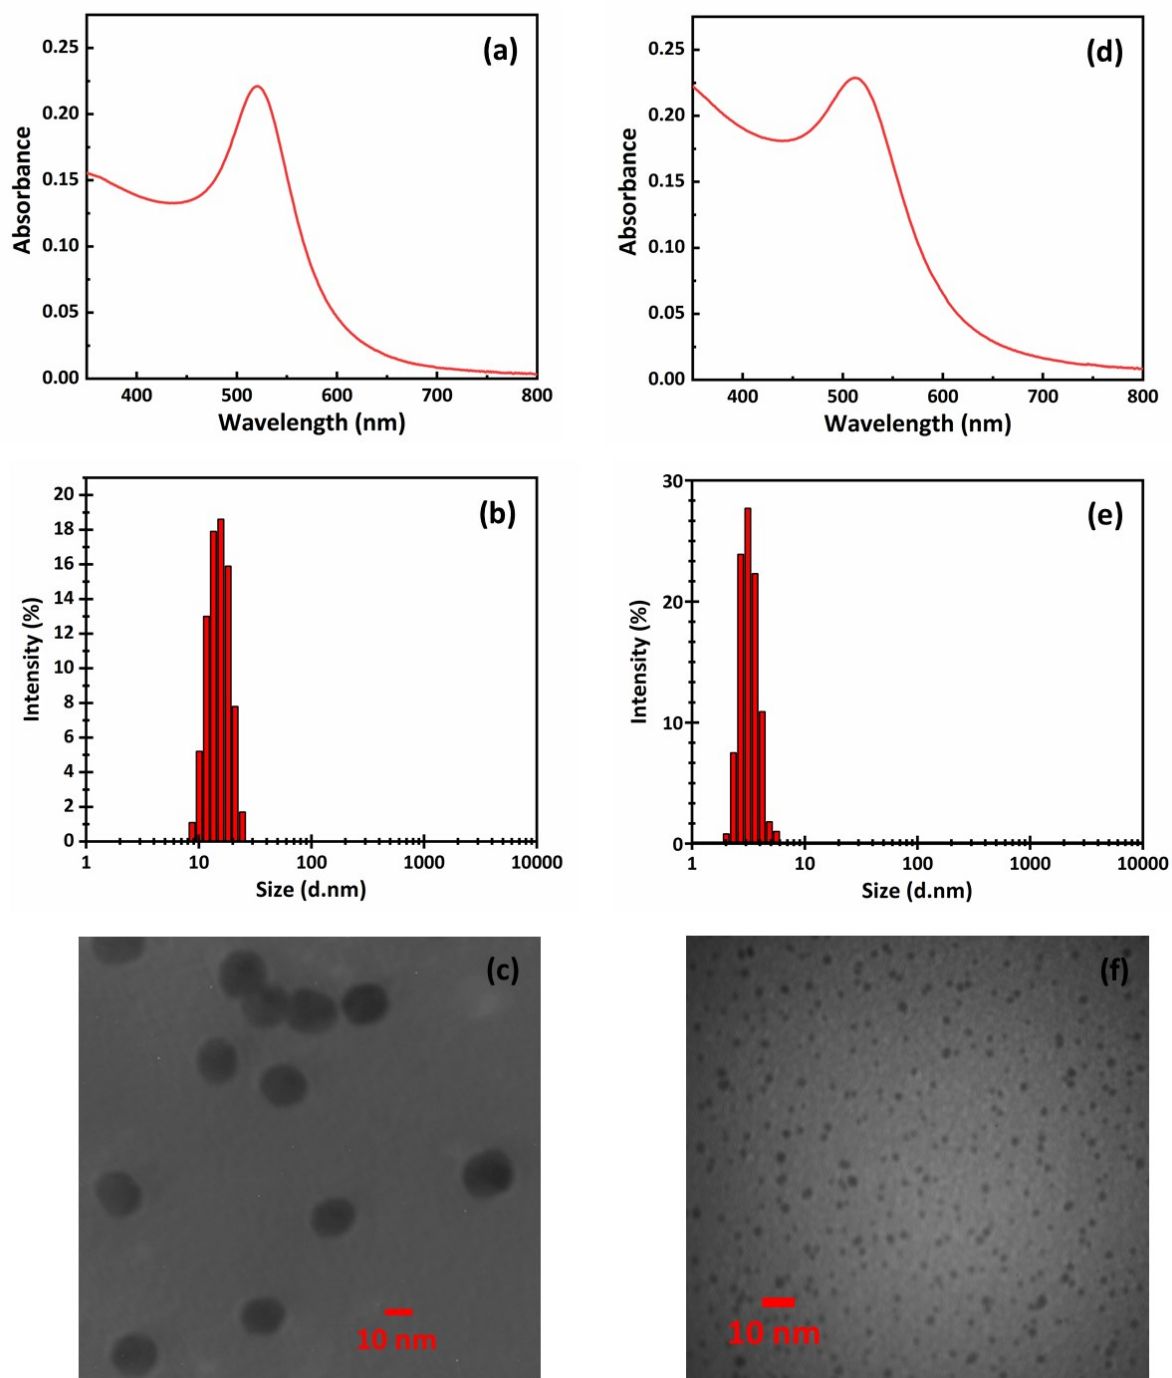

**Fig. S2.** UV-Vis spectrum, intensity size distribution, and TEM image of citrate-capped (CT) AuNPs (a, b, c, respectively), and borohydride-capped (BH) AuNPs (d, e, f, respectively)

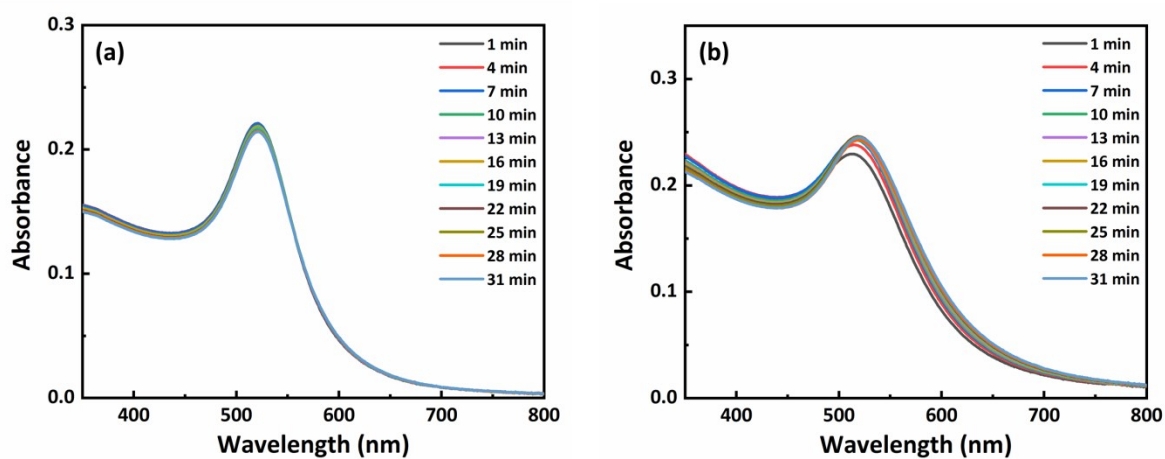

**Fig. S3.** The stability of (a) CT-AuNPs (0.5 nmol L<sup>-1</sup> in the presence of citrate buffer pH 4.5), and (b) BH-AuNPs (0.224 μmol L<sup>-1</sup> in the presence of phosphate buffer pH 8.0) over time

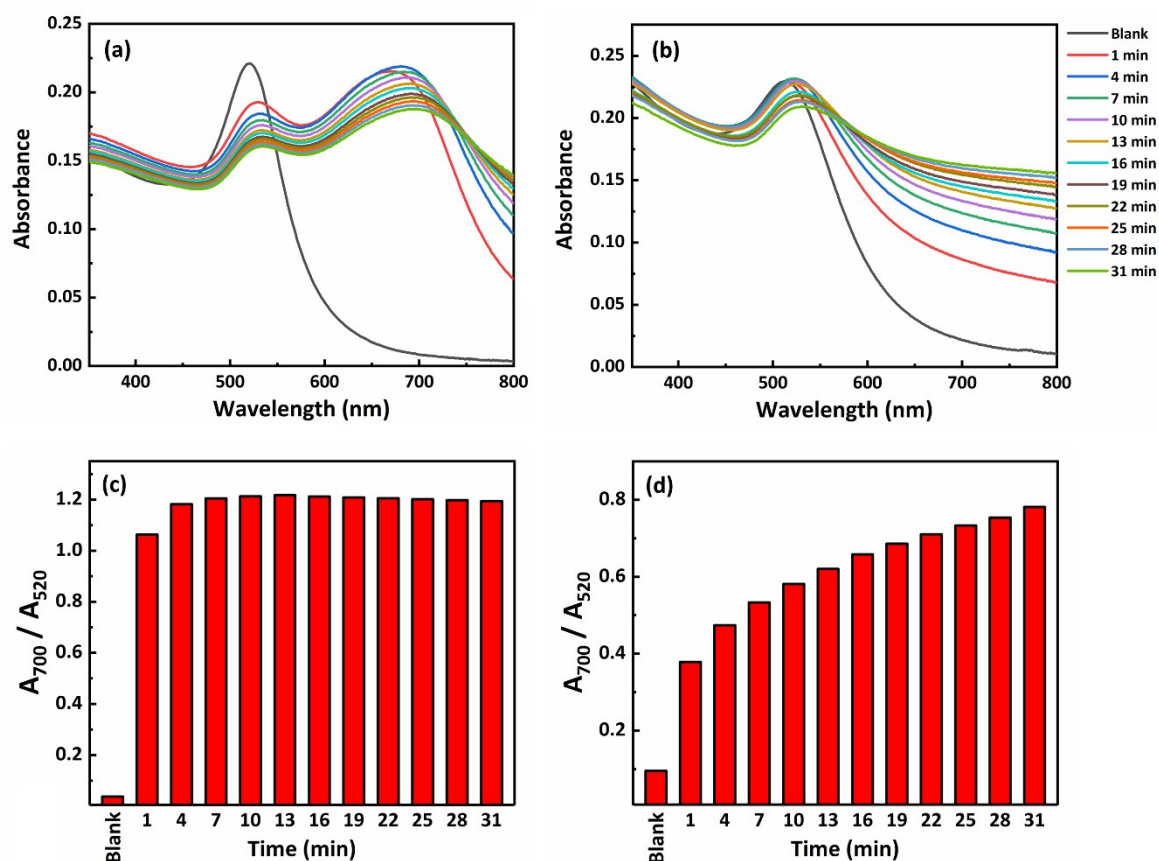

**Fig. S4.** Time-course variation in UV-Vis spectra of the sensing element (a) CT AuNPs, and (b) BH AuNPs upon the addition of TM at a concentration of 100 ng mL<sup>-1</sup>. The effect of incubation time (as bar plot) on the aggregation of the sensing element (c) CT-AuNPs, and (d) BH-AuNPs. The signal ( $A_{700}/A_{520}$ ) is defined as the ratio of absorbance values at wavelength 700 and 520 nm, respectively.

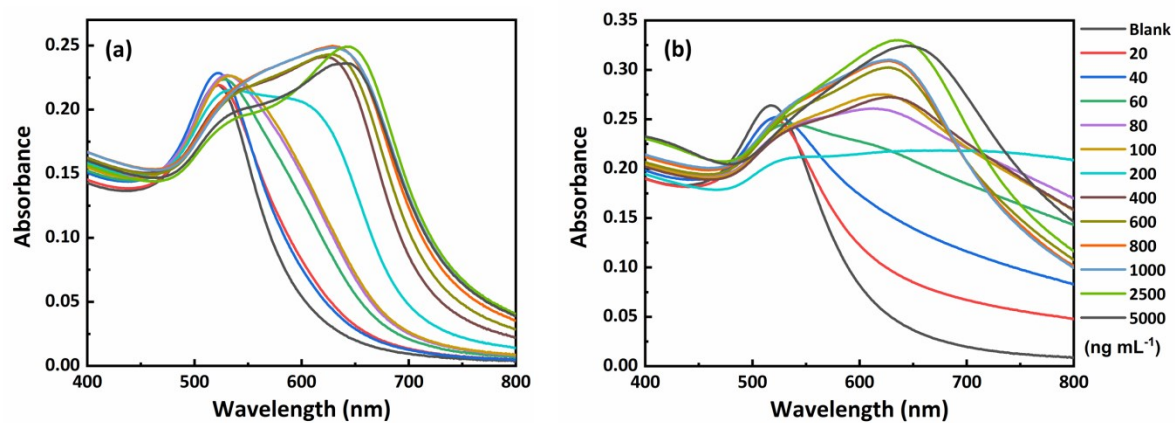

**Fig. S5.** Absorbance spectra of the sensing element (a) CT-AuNPs and (b) BH-AuNPs before and after exposure to different concentrations of bifentazate (BF) ranging from 20-5000 ng mL<sup>-1</sup>



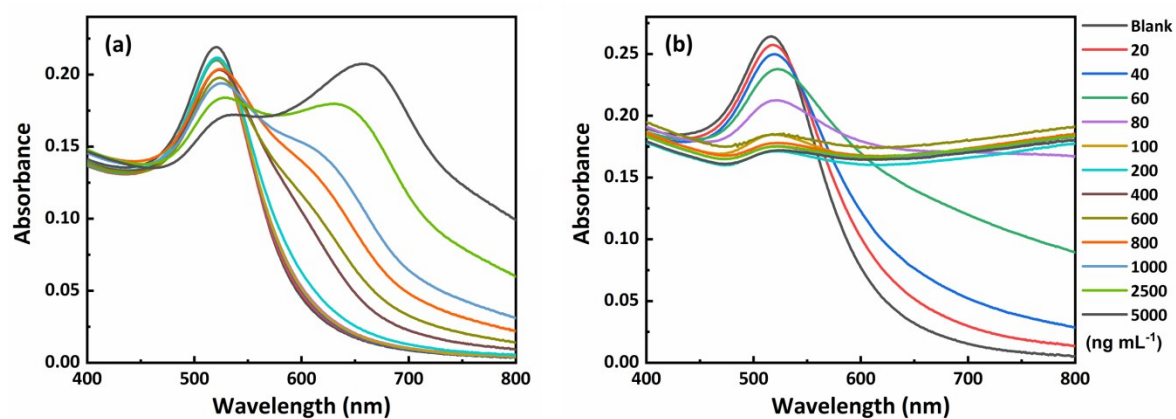

**Fig. S6.** Absorbance spectra of the sensing element (a) CT-AuNPs and (b) BH-AuNPs before and after exposure to different concentrations of paraquat (PQ) ranging from 20-5000 ng mL<sup>-1</sup>

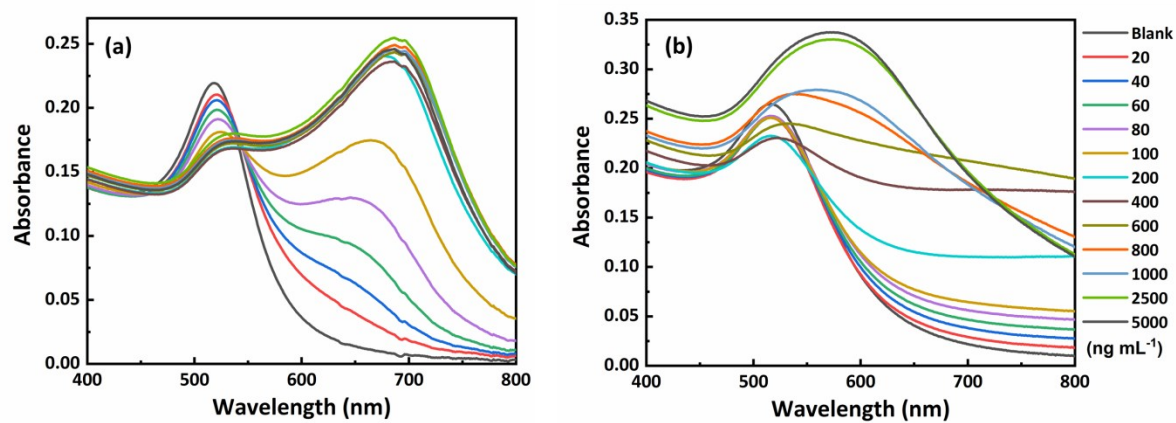

**Fig. S7.** Absorbance spectra of the sensing element (a) CT-AuNPs and (b) BH-AuNPs before and after exposure to different concentrations of azinphos-methyl (AM) ranging from 20-5000 ng mL<sup>-1</sup>

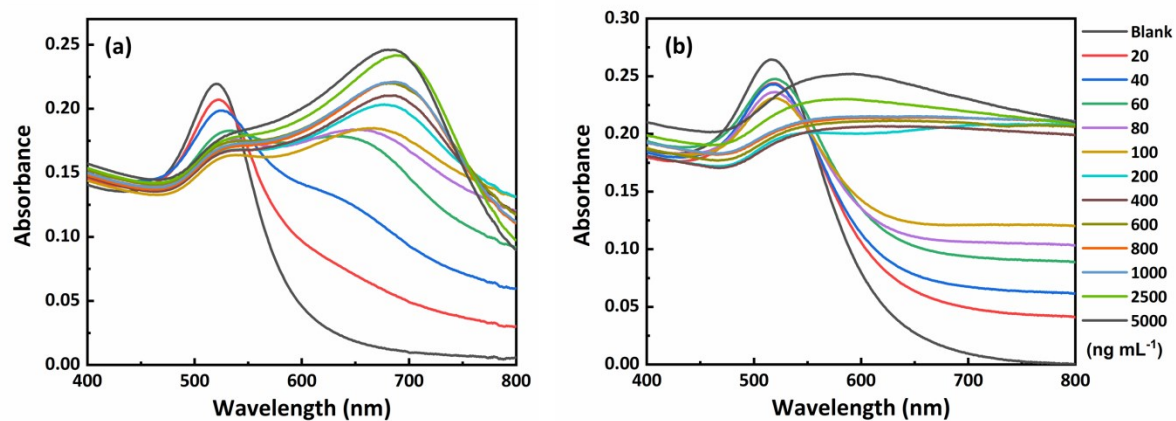

**Fig. S8.** Absorbance spectra of the sensing element (a) CT-AuNPs and (b) BH-AuNPs before and after exposure to different concentrations of thiometon (TM) ranging from 20-5000 ng mL<sup>-1</sup>

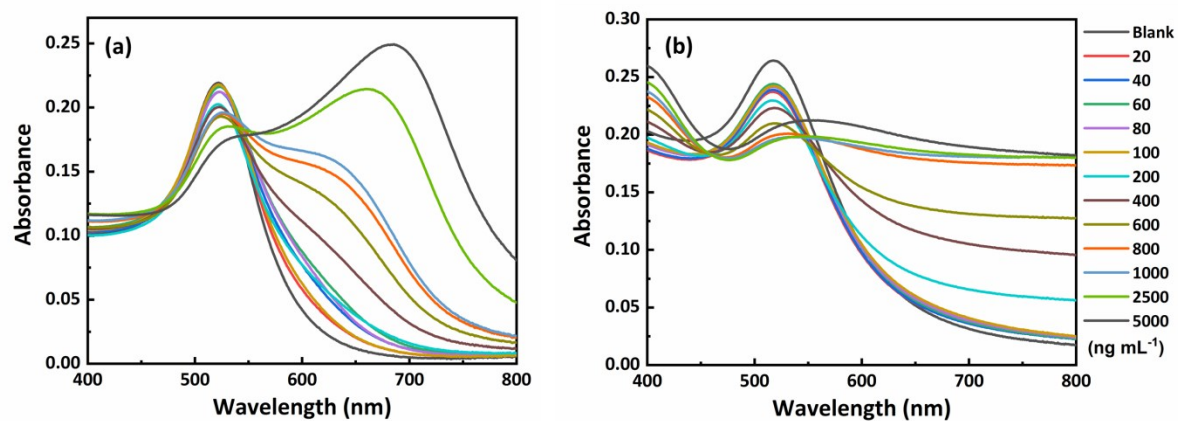

**Fig. S9.** Absorbance spectra of the sensing element (a) CT-AuNPs and (b) BH-AuNPs before and after exposure to different concentrations of parathion-methyl (PM) ranging from 20-5000  $\text{ng mL}^{-1}$

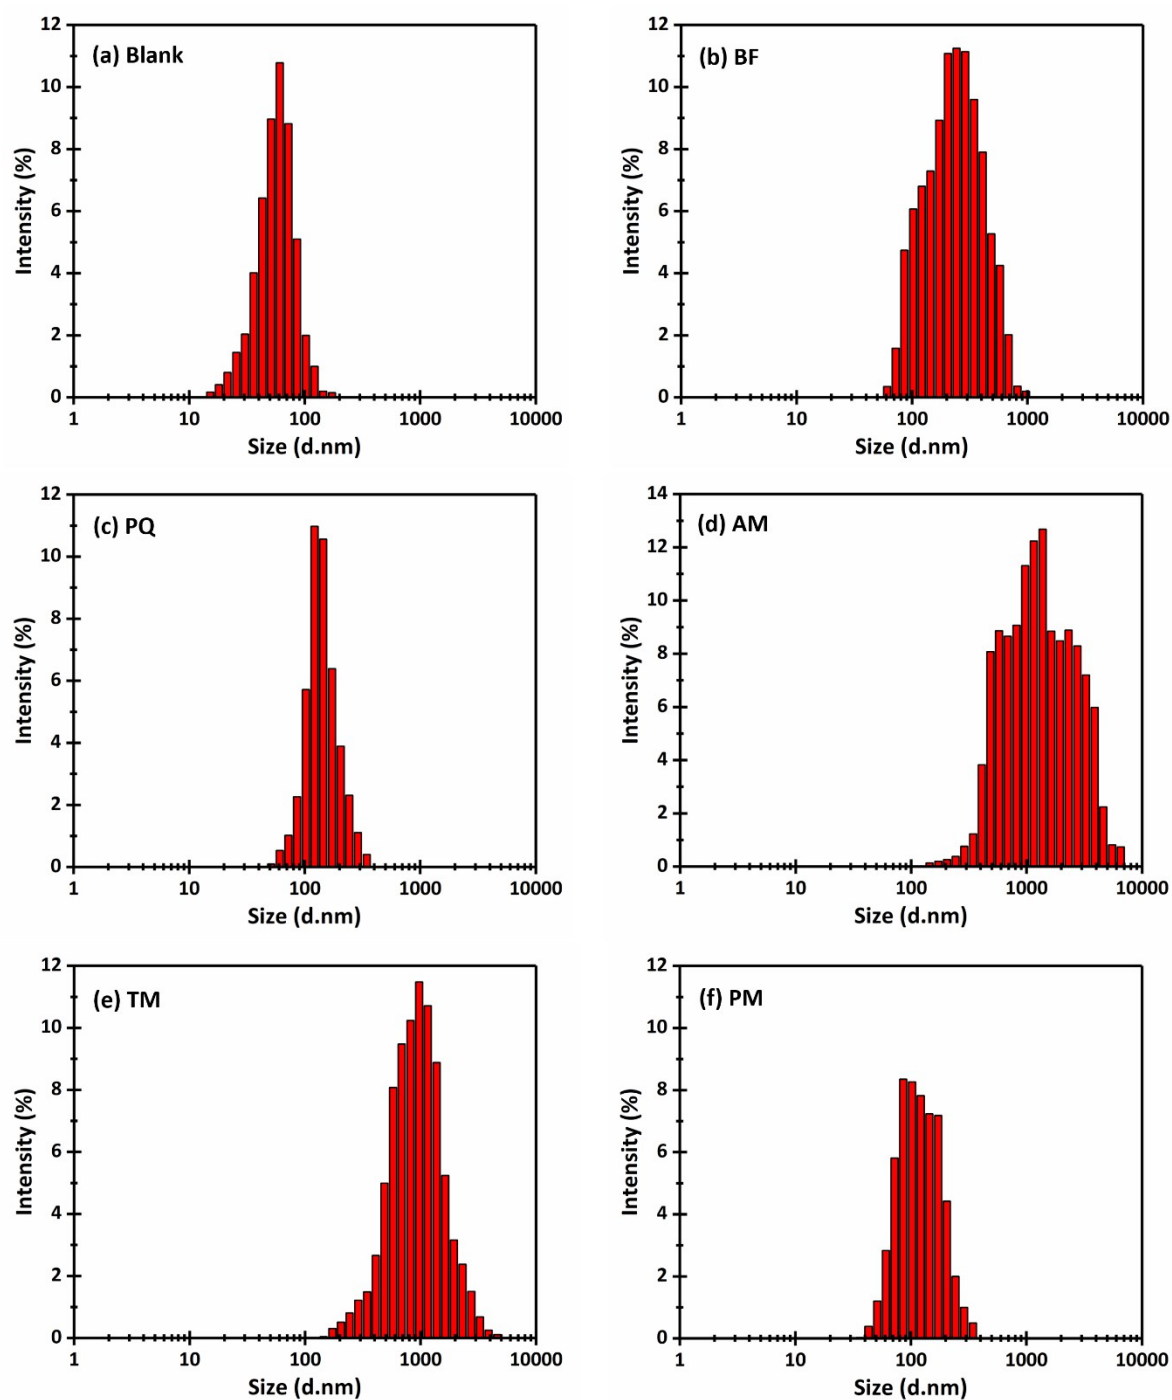

**Fig. S10.** Intensity size distribution of the sensing element CT-AuNPs (a) before, and after exposure to 200 ng mL<sup>-1</sup> of (b) BF, (c) PQ, (d) AM, (e) TM, and (f) PM

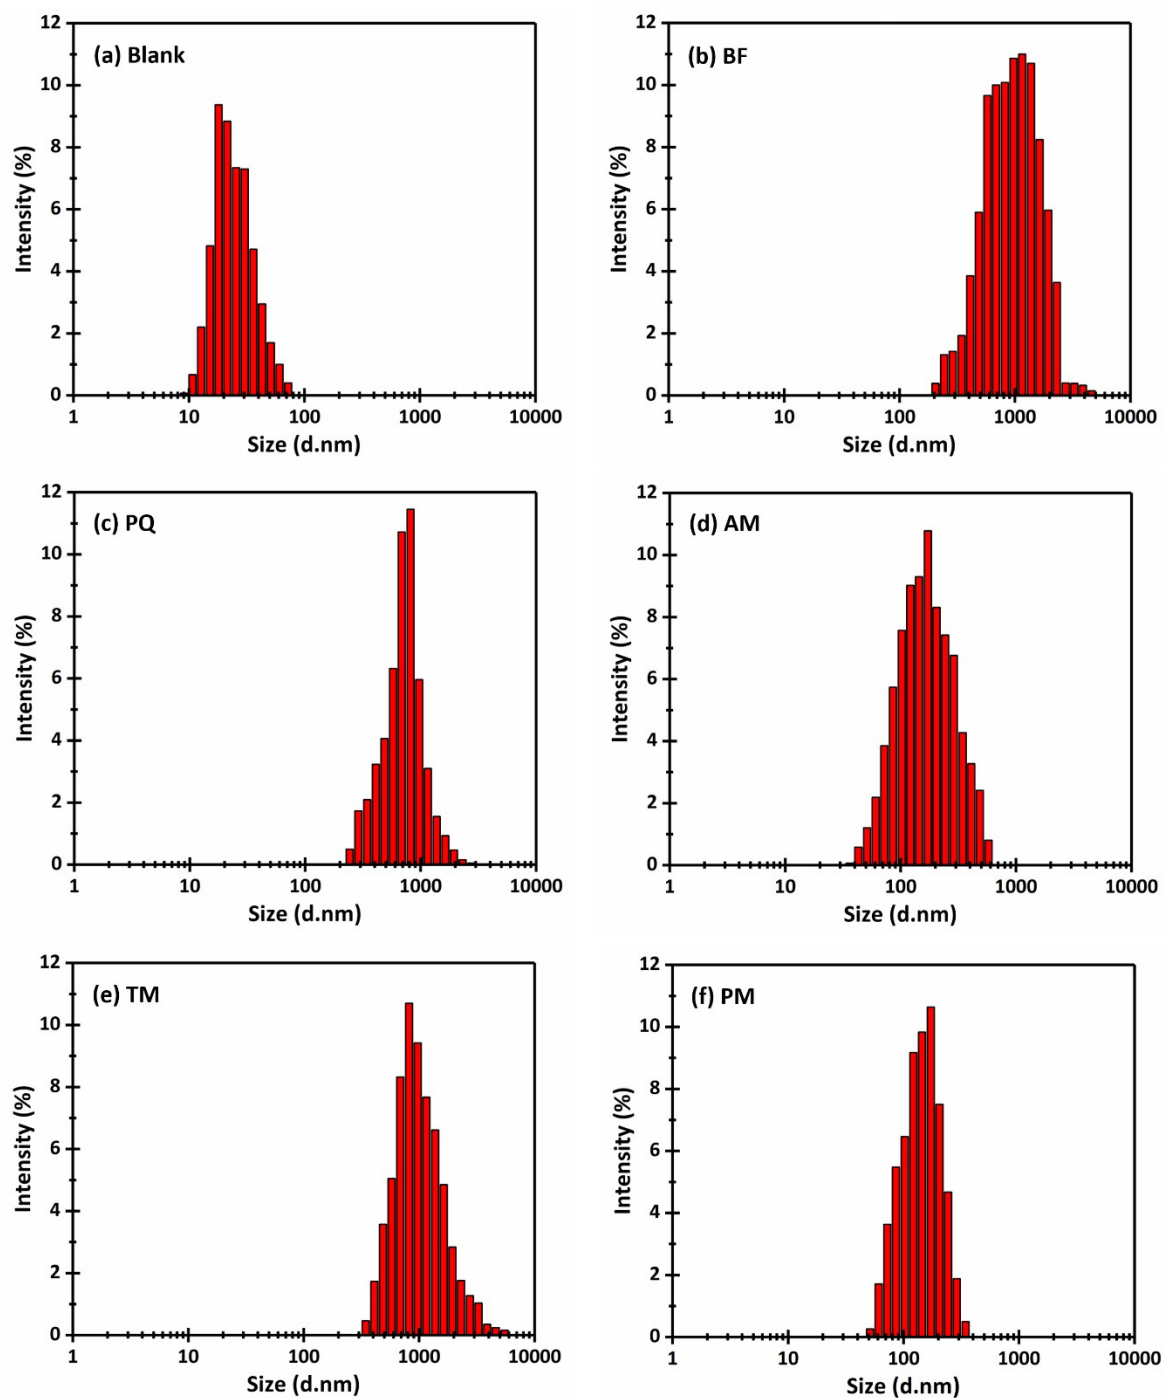

**Fig. S11.** Intensity size distribution of the sensing element BH-AuNPs (a) before, and after exposure to 200 ng mL<sup>-1</sup> of (b) BF, (c) PQ, (d) AM, (e) TM, and (f) PM

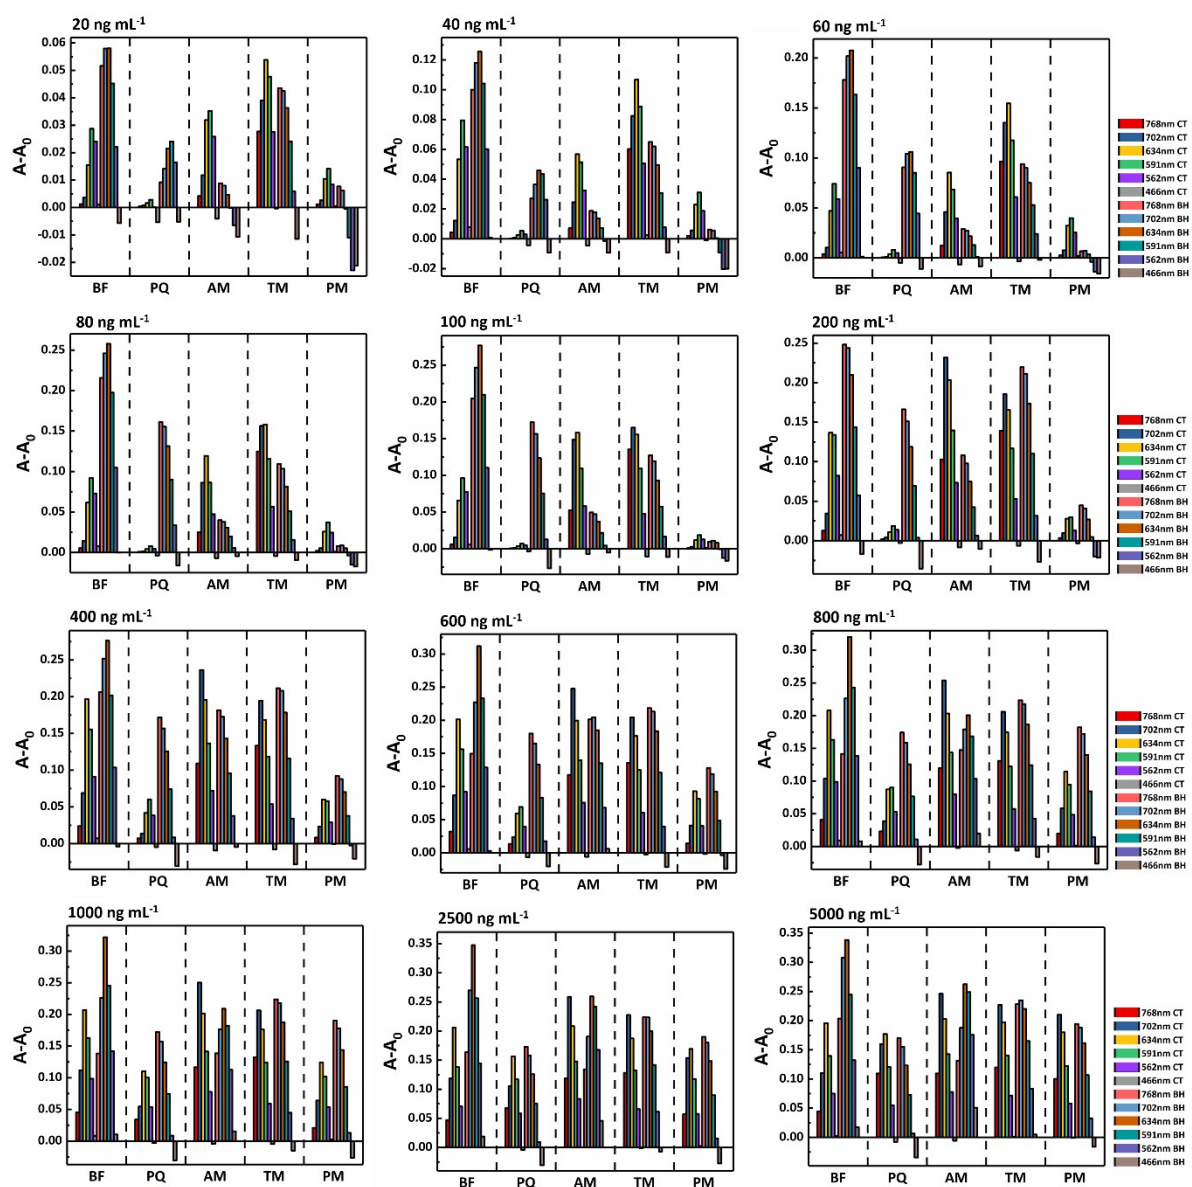

**Fig. S12.** Absorbance response patterns (bar plots) of the sensing elements (CT- and BH-AuNPs) against BF, PQ, AM, TM, and PM pesticides at different concentrations ranging from 20-5000  $\text{ng mL}^{-1}$  at six wavelengths of 768, 702, 634, 591, 562, and 466 nm

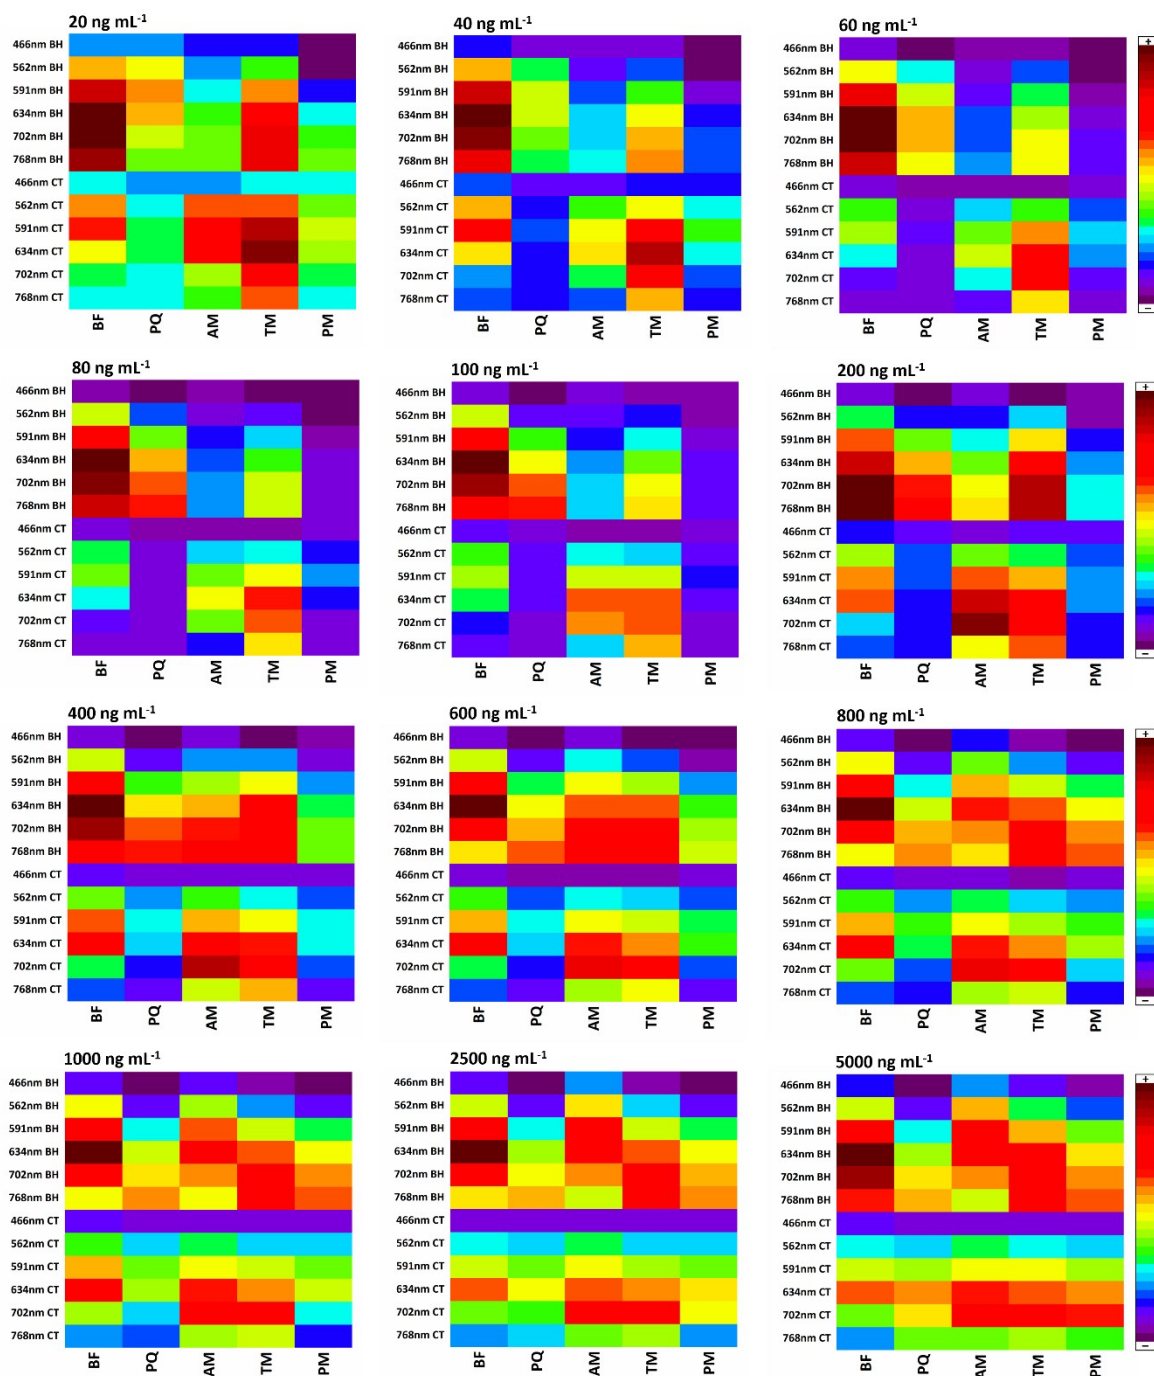

**Fig. S13.** Heat map of the sensing elements (CT- and BH-AuNPs) against BF, PQ, AM, TM, and PM pesticides at different concentrations ranging from 20-5000 ng mL<sup>-1</sup> at six wavelengths of 768, 702, 634, 591, 562, and 466 nm



**Table S1.** Leave-one-out analysis by Jackknifing in linear discriminant analysis (LDA); each group contains eight concentrations of the pesticides (BF, PQ, AM, TM, and PM) with three replicates.

|       | Predicted Group |         |         |         |         |         |
|-------|-----------------|---------|---------|---------|---------|---------|
|       | BF              | PQ      | AM      | TM      | PM      | Total   |
| BF    | 24              | 0       | 0       | 0       | 0       | 24      |
|       | 100.00%         | 0.00%   | 0.00%   | 0.00%   | 0.00%   | 100.00% |
| PQ    | 0               | 24      | 0       | 0       | 0       | 24      |
|       | 0.00%           | 100.00% | 0.00%   | 0.00%   | 0.00%   | 100.00% |
| AM    | 0               | 0       | 24      | 0       | 0       | 24      |
|       | 0.00%           | 0.00%   | 100.00% | 0.00%   | 0.00%   | 100.00% |
| TM    | 0               | 0       | 0       | 24      | 0       | 24      |
|       | 0.00%           | 0.00%   | 0.00%   | 100.00% | 0.00%   | 100.00% |
| PM    | 0               | 0       | 0       | 0       | 24      | 24      |
|       | 0.00%           | 0.00%   | 0.00%   | 0.00%   | 100.00% | 100.00% |
| Total | 24              | 24      | 24      | 24      | 24      | 120     |
|       | 20.00%          | 20.00%  | 20.00%  | 20.00%  | 20.00%  | 100.00% |

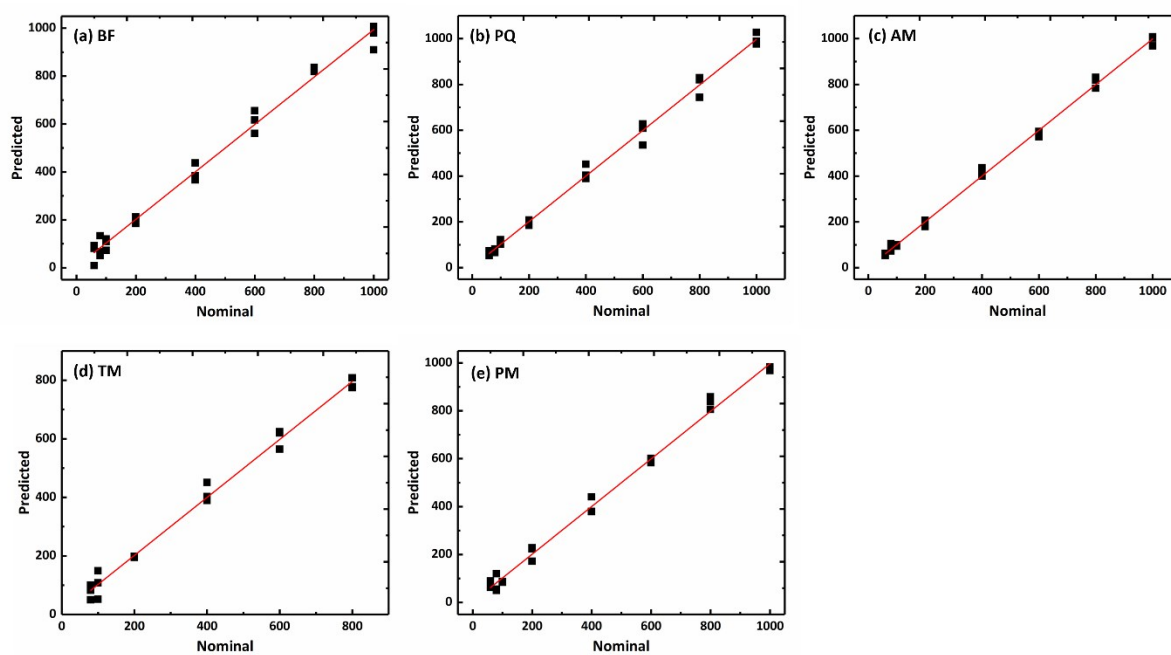

**Fig. S14.** Predicted vs nominal plots from PLS- regression method for (a) BF, (b) PQ, (c) AM, (d) TM, and (e) PM pesticides

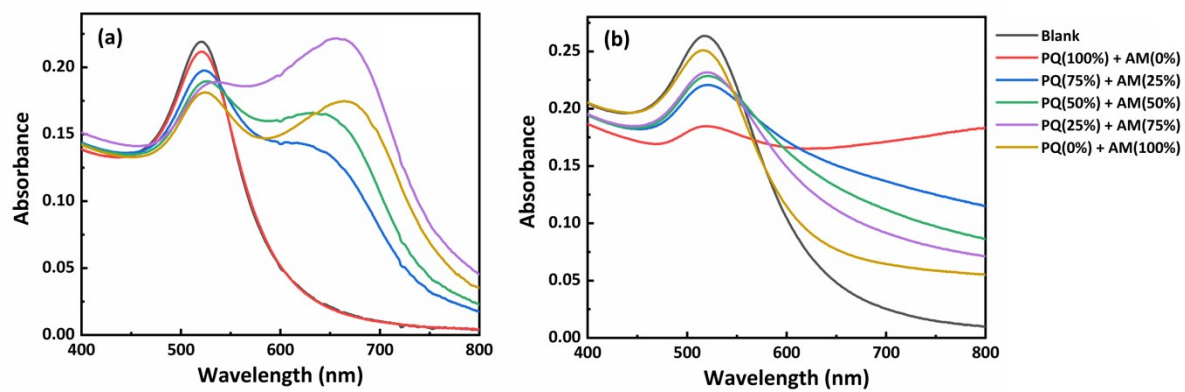

**Fig. S15.** Absorbance spectra of the sensing element (a) CT-AuNPs and (b) BH-AuNPs before and after exposure to a total concentration of  $100 \text{ ng mL}^{-1}$  of PQ, AM, and their mixtures

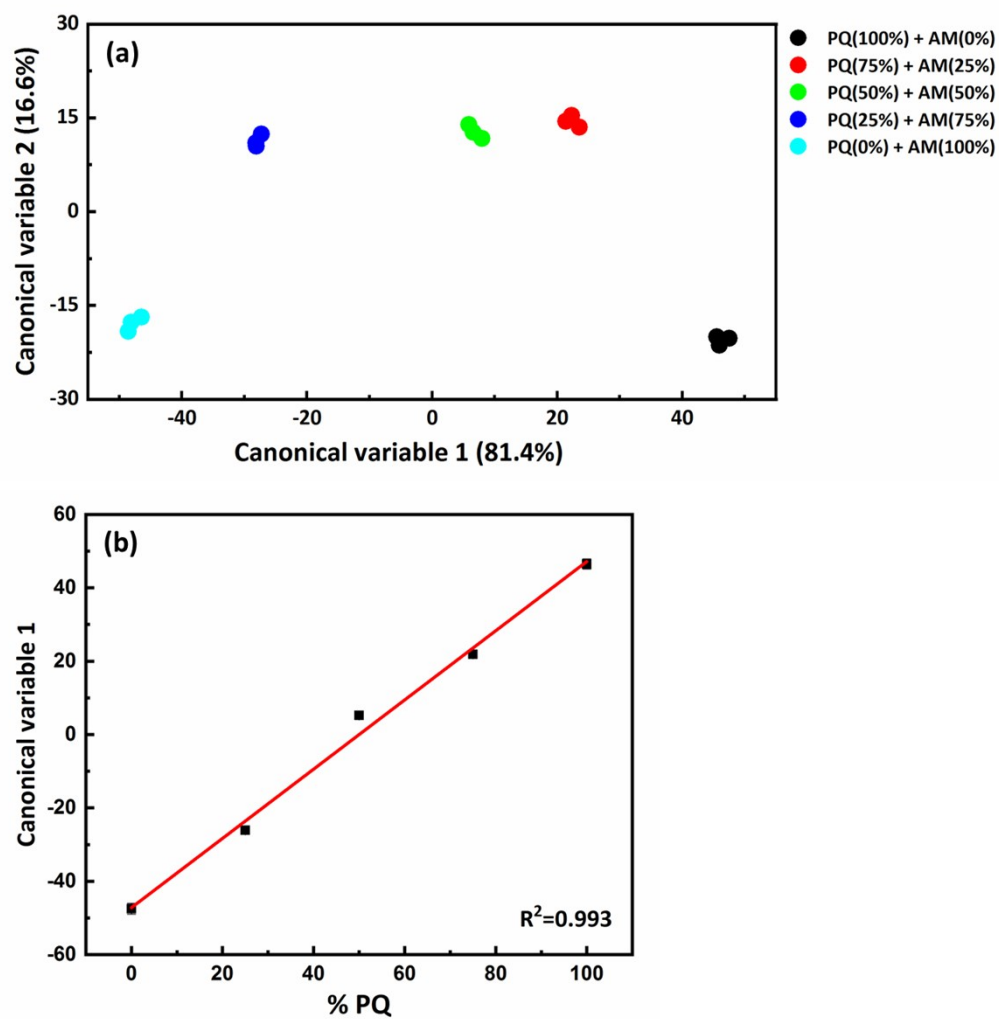

**Fig. S16.** (a) Two-dimensional score plot discriminating the mixtures of PQ and AM with different percentage (total concentration was  $100 \text{ ng mL}^{-1}$ ), and (b) canonical variable 1 (from part a) plotted versus the percentage of PQ

**Table S2.** Leave-one-out analysis by Jackknifing in the linear discriminant analysis (LDA); each group contains a mixture of PQ and AM in different percentage with three replicates.

|                   | Predicted Group   |                   |                   |                   |                   |         |
|-------------------|-------------------|-------------------|-------------------|-------------------|-------------------|---------|
|                   | PQ(100%) + AM(0%) | PQ(75%) + AM(25%) | PQ(50%) + AM(50%) | PQ(25%) + AM(25%) | PQ(0%) + AM(100%) | Total   |
| PQ(100%) + AM(0%) | 3                 | 0                 | 0                 | 0                 | 0                 | 3       |
|                   | 100.00%           | 0.00%             | 0.00%             | 0.00%             | 0.00%             | 100.00% |
| PQ(75%) + AM(25%) | 0                 | 3                 | 0                 | 0                 | 0                 | 3       |
|                   | 0.00%             | 100.00%           | 0.00%             | 0.00%             | 0.00%             | 100.00% |
| PQ(50%) + AM(50%) | 0                 | 0                 | 3                 | 0                 | 0                 | 3       |
|                   | 0.00%             | 0.00%             | 100.00%           | 0.00%             | 0.00%             | 100.00% |
| PQ(25%) + AM(25%) | 0                 | 0                 | 0                 | 3                 | 0                 | 3       |
|                   | 0.00%             | 0.00%             | 0.00%             | 100.00%           | 0.00%             | 100.00% |
| PQ(0%) + AM(100%) | 0                 | 0                 | 0                 | 0                 | 3                 | 3       |
|                   | 0.00%             | 0.00%             | 0.00%             | 0.00%             | 100.00%           | 100.00% |
| Total             | 3                 | 3                 | 3                 | 3                 | 3                 | 15      |
|                   | 20.00%            | 20.00%            | 20.00%            | 20.00%            | 20.00%            | 100.00% |

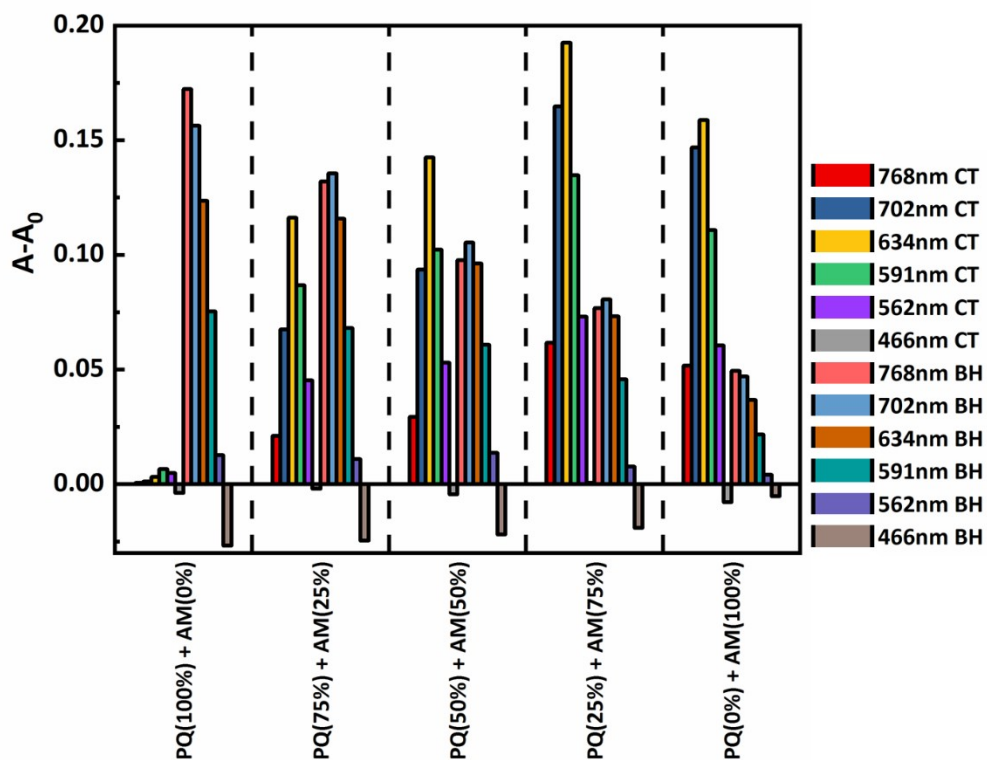

**Fig. S17.** Absorbance response patterns (bar plots) of the sensing elements (CT- and BH-AuNPs) against the mixtures of PQ and AM with different percentage (total concentration was  $100 \text{ ng mL}^{-1}$ ) at six wavelengths of 768, 702, 634, 591, 562, and 466 nm

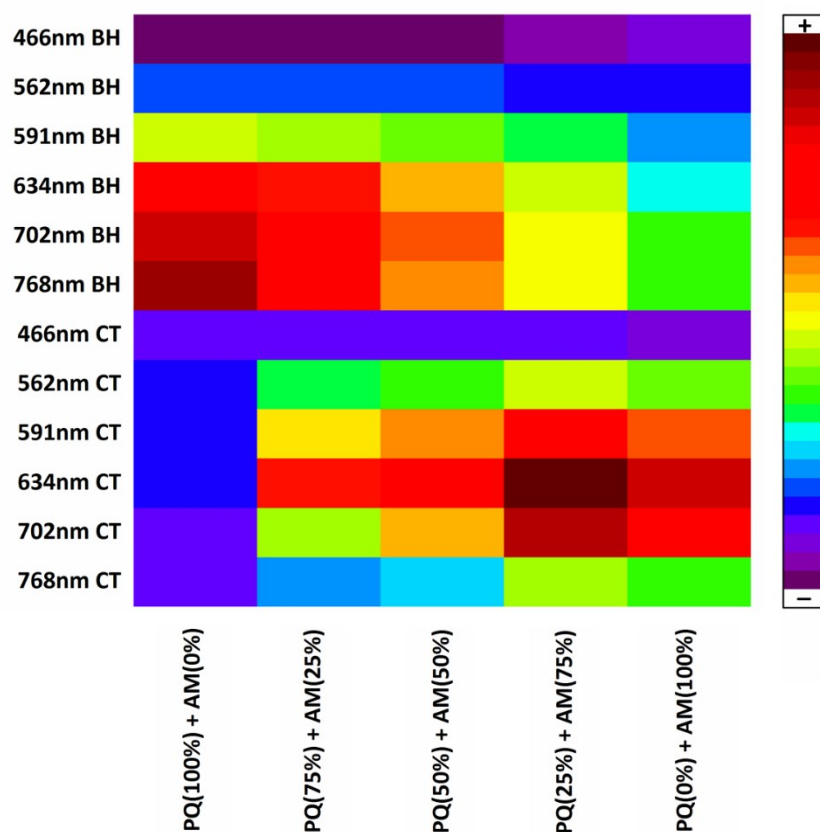

**Fig. S18.** Heat map of the sensing elements (CT- and BH-AuNPs) against the mixtures of PQ and AM with different percentage (total concentration was  $100 \text{ ng mL}^{-1}$ ) at six wavelengths of 768, 702, 634, 591, 562, and 466 nm

**Table S3.** Identification of unknown pesticides in the lime samples based on the calculation of Mahalanobis distance of each unknown from the centroid of training groups. LDA was performed on the data matrix containing the test set data (BF, PQ, AM, TM, and PM at concentrations 200 ng mL<sup>-1</sup> with three replicates in the real sample of lime) and the training set data (BF, PQ, AM, TM, and PM at concentrations 60, 80, 100, 200, 400, 600, 800, and 1000 ng mL<sup>-1</sup> with three replicates).

| Sample | Mahalanobis distance-square |           |           |           |           | Identified | Accuracy of identification |
|--------|-----------------------------|-----------|-----------|-----------|-----------|------------|----------------------------|
|        | BF                          | PQ        | AM        | TM        | PM        |            |                            |
| 1      | 45.36131                    | 126.78796 | 191.99359 | 220.96947 | 148.91471 | BF         | Yes                        |
| 2      | 43.87954                    | 102.55999 | 179.75357 | 201.1711  | 122.80454 | BF         | Yes                        |
| 3      | 41.31105                    | 105.64168 | 171.08573 | 195.18349 | 128.08483 | BF         | Yes                        |
| 4      | 201.51787                   | 72.82814  | 104.69993 | 82.05639  | 108.03062 | PQ         | Yes                        |
| 5      | 148.62868                   | 30.36855  | 104.35081 | 84.85261  | 53.23868  | PQ         | Yes                        |
| 6      | 158.33014                   | 42.2233   | 101.75719 | 72.24844  | 70.39314  | PQ         | Yes                        |
| 7      | 226.2669                    | 103.72279 | 57.81268  | 122.6263  | 95.87441  | AM         | Yes                        |
| 8      | 231.91045                   | 116.8669  | 69.16256  | 139.09023 | 126.0507  | AM         | Yes                        |
| 9      | 224.01716                   | 107.03395 | 57.07736  | 134.00643 | 98.64147  | AM         | Yes                        |
| 10     | 289.85886                   | 142.2333  | 267.26395 | 52.80494  | 160.24572 | TM         | Yes                        |
| 11     | 263.1207                    | 113.72233 | 184.61032 | 28.78659  | 157.80008 | TM         | Yes                        |
| 12     | 276.24597                   | 118.68355 | 200.77878 | 26.0917   | 163.33792 | TM         | Yes                        |
| 13     | 138.59799                   | 39.6375   | 100.57843 | 99.1637   | 26.56069  | PM         | Yes                        |
| 14     | 150.72512                   | 48.9046   | 130.41298 | 122.77771 | 30.78778  | PM         | Yes                        |
| 15     | 166.55147                   | 58.26904  | 142.73798 | 138.36148 | 48.16191  | PM         | Yes                        |



**Table S4.** A list of NP-based sensor arrays for the identification of pesticides (OP= organophosphate, CB= carbamate, BP= bipyridylum)

| Target pesticides | Group | Discriminated concentrations (ng mL <sup>-1</sup> ) | Sensing elements                                                                 | Ref.      |
|-------------------|-------|-----------------------------------------------------|----------------------------------------------------------------------------------|-----------|
| Azinphos-methyl   | OP    | 120-400                                             | AuNPs at different pHs and different NaCl concentrations (nine sensing elements) | [1]       |
| Chlorpyrifos      | OP    |                                                     |                                                                                  |           |
| Fenamiphos        | OP    |                                                     |                                                                                  |           |
| Pirimiphos-methyl | OP    |                                                     |                                                                                  |           |
| Phosalone         | OP    |                                                     |                                                                                  |           |
| Azinphos-methyl   | OP    | 50-800                                              | AgNPs at different pHs (three sensing elements)                                  | [2]       |
| Phosalone         | OP    |                                                     |                                                                                  |           |
| Bifenazate        | CB    | 20-5000                                             | AuNPs with different surface coating (two sensing elements)                      | This work |
| Paraquat          | BP    |                                                     |                                                                                  |           |
| Azinphos-methyl   | OP    |                                                     |                                                                                  |           |
| Thiometon         | OP    |                                                     |                                                                                  |           |
| Parathion-methyl  | OP    |                                                     |                                                                                  |           |

## References

1. N. Fahimi-Kashani and M. R. Hormozi-Nezhad, *Anal. Chem.*, 2016, **88**, 8099-8106.
2. A. Orouji, S. Abbasi-Moayed and M. R. Hormozi-Nezhad, *Spectrochim. Acta A*, 2019, **219**, 496-503.
